# Supplementary material for: Surviving sepsis campaign: International guidelines for management of sepsis and septic shock in adults 2021 ‐ endorsement by the Scandinavian society of anaesthesiology and intensive care medicine
Source: PubMed Central journal article supplement — Acta Anaesthesiol Scand. 2022 Mar 6;66(5):634–5. doi: 10.1111/aas.14045 (PMC9310818; doi:10.1111/aas.14045), 2022-03-06
Supplement: AAS-66-634-s001.pdf [file AAS-66-634-s001.pdf]

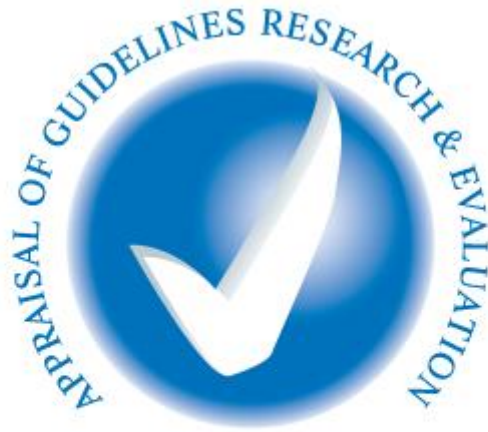

# AGREE II

## **A critical group appraisal of: Surviving sepsis campaign: international guidelines for management of sepsis and septic shock 2021 using the AGREE II Instrument**

Created with the AGREE II Online Guideline Appraisal Tool.

No endorsement of the content of this document by the AGREE Research Trust should be implied.

Co-ordinator: Marius Rehn

Date: 25 January 2022

Email: [marius.rehn@norskluftambulanse.no](mailto:marius.rehn@norskluftambulanse.no)

URL of this appraisal: <http://www.agreetrust.org/group-appraisal/15564>

Guideline URL: <https://link.springer.com/article/10.1007/s00134-021-06506-y>

|          |          |          |          |          |          |      |                                             |
|----------|----------|----------|----------|----------|----------|------|---------------------------------------------|
| Domain 1 | Domain 2 | Domain 3 | Domain 4 | Domain 5 | Domain 6 | OA 1 | OA 2                                        |
| 89%      | 92%      | 81%      | 89%      | 73%      | 85%      | 87%  | Yes - 5, Yes with modifications - 0, No - 0 |

*Domain 1. Scope and Purpose*

|        | Appraiser 4 | Appraiser 7 | Appraiser 8 | Appraiser 5 | Appraiser 2 |
|--------|-------------|-------------|-------------|-------------|-------------|
| Item 1 | 6           | 7           | 6           | 4           | 7           |
| Item 2 | 6           | 7           | 6           | 7           | 6           |
| Item 3 | 7           | 6           | 7           | 7           | 6           |

*Domain 2. Stakeholder Involvement*

|        | Appraiser 4 | Appraiser 7 | Appraiser 8 | Appraiser 5 | Appraiser 2 |
|--------|-------------|-------------|-------------|-------------|-------------|
| Item 4 | 7           | 7           | 7           | 6           | 7           |
| Item 5 | 4           | 7           | 7           | 7           | 6           |
| Item 6 | 6           | 7           | 6           | 7           | 7           |

*Domain 3. Rigour of Development*

|         | Appraiser 4 | Appraiser 7 | Appraiser 8 | Appraiser 5 | Appraiser 2 |
|---------|-------------|-------------|-------------|-------------|-------------|
| Item 7  | 7           | 7           | 7           | 7           | 7           |
| Item 8  | 6           | 7           | 6           | 3           | 6           |
| Item 9  | 7           | 6           | 6           | 6           | 4           |
| Item 10 | 6           | 6           | 7           | 7           | 5           |
| Item 11 | 7           | 6           | 7           | 7           | 6           |
| Item 12 | 7           | 6           | 7           | 7           | 4           |
| Item 13 | 6           | 5           | 7           | 5           | 6           |
| Item 14 | 5           | 4           | 4           | 1           | 4           |

*Domain 4. Clarity of Presentation*

|         | Appraiser 4 | Appraiser 7 | Appraiser 8 | Appraiser 5 | Appraiser 2 |
|---------|-------------|-------------|-------------|-------------|-------------|
| Item 15 | 6           | 6           | 7           | 6           | 6           |
| Item 16 | 6           | 7           | 6           | 6           | 6           |
| Item 17 | 7           | 7           | 7           | 7           | 5           |

*Domain 5. Applicability*

|  | Appraiser 4 | Appraiser 7 | Appraiser 8 | Appraiser 5 | Appraiser 2 |
|--|-------------|-------------|-------------|-------------|-------------|
|--|-------------|-------------|-------------|-------------|-------------|

|                                         |             |             |             |             |             |
|-----------------------------------------|-------------|-------------|-------------|-------------|-------------|
| Item 18                                 | 6           | 6           | 7           | 6           | 5           |
| Item 19                                 | 6           | 6           | 6           | 4           | 4           |
| Item 20                                 | 5           | 6           | 5           | 7           | 5           |
| Item 21                                 | 4           | 4           | 7           | 4           | 4           |
| <i>Domain 6. Editorial Independence</i> |             |             |             |             |             |
|                                         | Appraiser 4 | Appraiser 7 | Appraiser 8 | Appraiser 5 | Appraiser 2 |
| Item 22                                 | 5           | 6           | 7           | 4           | 6           |
| Item 23                                 | 6           | 7           | 7           | 7           | 6           |
| <i>Overall Assessment</i>               |             |             |             |             |             |
|                                         | Appraiser 4 | Appraiser 7 | Appraiser 8 | Appraiser 5 | Appraiser 2 |
| OA1                                     | 6           | 6           | 7           | 7           | 5           |

Created online at [www.agreetrust.org](http://www.agreetrust.org) 25 January 2022
